## Changes in Muscle Sympathetic Nerve Activity, Venous Plasma Catecholamines, and Calf Vascular Resistance during Mechanical Ventilation with PEEP in Humans

Hans Selldén, M.D.,\* Henrik Sjövall, M.D., Ph.D.,† B. Gunnar Wallin, M.D., Ph.D.,‡  
Jan Häggendal, M.D., Ph.D.,§ Sven-Erik Ricksten, M.D., Ph.D.¶

The sympathetic reflex response to mechanical ventilation with PEEP was studied in conscious human volunteers ( $n = 8$ ). Muscle sympathetic nerve activity (MSNA) was measured from the peroneal nerve, calf blood flow, forearm venous plasma catecholamines, blood pressure, heart rate, airway pressure, and end-tidal  $\text{CO}_2$  (%) during spontaneous breathing and during mechanical ventilation with 0–20  $\text{cmH}_2\text{O}$  PEEP. MSNA increased ( $P < 0.01$ ) during PEEP ventilation, from 22 bursts  $\cdot \text{min}^{-1}$  at spontaneous breathing to 39 bursts  $\cdot \text{min}^{-1}$  at 20 PEEP. This increase in MSNA was accompanied by an increase ( $P < 0.01$ ) in calf vascular resistance (CVR) from 35 PRU<sub>100</sub> at spontaneous breathing to 48 PRU<sub>100</sub> at 15 PEEP with no further increase at 20 PEEP. Venous plasma norepinephrine concentrations increased ( $P < 0.01$ ) during PEEP ventilation from 0.19  $\text{ng} \cdot \text{ml}^{-1}$  at spontaneous breathing to 0.31  $\text{ng} \cdot \text{ml}^{-1}$  at 20 PEEP, whereas plasma epinephrine and dopamine were less than 0.03  $\text{ng} \cdot \text{ml}^{-1}$  during the experiment. Blood pressure and heart rate were not affected by PEEP ventilation except at 20 PEEP, where blood pressure and heart rate increased ( $P < 0.01$ ). The results show that PEEP ventilation induces a considerable reflex increase of MSNA, reflected also by an increase in CVR and venous plasma norepinephrine. It is proposed that the main mechanism responsible for these reflex adjustments is caused by a decreased activity of the cardiopulmonary low-pressure baroreceptors, in turn resulting from a decrease in cardiac transmural pressures due to PEEP ventilation. (Key words: Measurement techniques: microneurography. Sympathetic nervous system; plasma catecholamines; sympathetic nerve activity. Ventilation: positive end expiratory pressure.)

MECHANICAL VENTILATION with PEEP decreases cardiac output and stroke volume.<sup>1–6</sup> The mechanism by

which cardiac output is reduced remains controversial. Cournand *et al.*<sup>1</sup> observed that mechanical ventilation lowered right ventricular end-diastolic transmural pressure, suggesting impaired venous return due to the increased intrathoracic pressure. It has also been suggested that the reduction of cardiac output may be caused by a humorally or reflexly mediated depression of cardiac function<sup>7,8</sup> or by a decreased distensibility of the left ventricle due to a leftward shift of the ventricular septum, impeding cardiac filling.<sup>4,9,10</sup> Reflex excitation of the sympathetic nervous system is probably important for the cardiovascular and humoral compensatory changes induced by mechanical ventilation, such as an increase in systemic vascular resistance,<sup>4–7,11</sup> an increase in the tone of the capacitance vessels,<sup>12,13</sup> and activation of the renin-angiotensin system.<sup>14,15</sup> It was recently shown that mechanical ventilation with increasing levels of PEEP induces reflex increases in renal and splanchnic sympathetic nerve activity in rats.<sup>16,17</sup> This reflex activation was explained by a decreased afferent activity from both arterial baroreceptors and cardiopulmonary low-pressure baroreceptors, due to a reduction of the transmural pressure in the carotid arteries and the aortic arch and a reduction in cardiac transmural filling pressure (“unloading” of the baroreceptors).

The present study was performed to analyze the effect of PEEP ventilation on the sympathetic outflow in conscious human volunteers. To this end, we have recorded muscle sympathetic nerve activity, calf blood flow, forearm venous plasma catecholamines, blood pressure, and heart rate during spontaneous breathing and during mechanical ventilation with increasing levels of PEEP.

### Methods

Experiments were performed on eight healthy men (mean age, 34 yr; range, 29–42 yr); all were anesthesiologists and were well acquainted with the function of a modern ventilator and the laboratory procedures and without history of pulmonary disease. The study protocol was approved by the Ethics Committee of the Medical Faculty of the University of Göteborg, and all participants gave their informed consent.

\* Research Fellow at the Department of Anesthesia and Intensive Care, University of Göteborg, Sweden.

† Associate Professor of Physiology, Department of Physiology, University of Göteborg, Sweden.

‡ Professor of Clinical Neurophysiology, Sahlgrens Hospital, Göteborg, Sweden.

§ Professor of Pharmacology, Department of Pharmacology, University of Göteborg, Sweden.

¶ Associate Professor of Anaesthesia and Intensive Care, Department of Anaesthesia and Intensive Care, Sahlgrens Hospital, Göteborg, Sweden.

Received from the Department of Clinical Neurophysiology and the Department of Anaesthesia and Intensive Care, Sahlgrens Hospital, Göteborg, Sweden. Accepted for publication September 14, 1988. Supported by grants from the Swedish Medical Research Council (No 3546 and No 166) and from the Swedish Medical Society. Presented in part at the meeting of Swedish Society of Anaesthesiologists September 18–19, 1986, Linköping, Sweden.

Address reprint requests to Dr. Selldén: Department of Pediatric Anesthesia, St Görans Hospital, P.O. Box 12500, S-112 81, Stockholm, Sweden.

### RECORDINGS OF MUSCLE SYMPATHETIC NERVE ACTIVITY (MSNA)

In the peroneal nerve at the fibular head, most fibers innervating skin and muscle travel in separate fascicles. A tungsten microelectrode, with a tip diameter of a few microns, was inserted in a muscle fascicle, which contains efferent sympathetic fibers, alpha and gamma motor neurons and various afferent fibers. Criteria that the electrode was positioned in a muscle fascicle, and not a skin fascicle of the nerve were: 1) weak electrical stimulation (1–3 V, 0.2 s, 1 Hz) through the electrode elicited involuntary muscle contractions but not cutaneous paresthesias; 2) tapping or stretching of the muscle innervated by the impaled fascicle elicited afferent mechanoreceptor discharge, whereas stroking the skin within the distribution area of the peroneal nerve did not evoke afferent impulses; 3) if a voluntary muscle contraction was made, an intense activity was recorded; and 4) arousal stimuli did not increase the recorded activity. When a correct position of the electrode in a muscle fascicle of the nerve was established, small electrode adjustments were made until multiunit, spontaneous, intermittent, and pulssynchronous bursts from efferent postganglionic sympathetic fibers could be recorded. Evidence that the impulses derived from efferent sympathetic fibers has been established previously and include: 1) injection of lidocaine around the nerve proximal and distal of the recording point, revealing the efferent nature of the impulses; 2) conduction velocities of approximately  $1 \text{ m} \cdot \text{s}^{-1}$  are typical for sympathetic fibers; and 3) iv ganglion blockade reversibly blocks the impulse traffic.<sup>18,19</sup>

The original nerve signal was fed through a band pass filter with a band width of 700–2,000 Hz. Both filtered and mean voltage neurograms (obtained by passing the filtered neurogram through a RC integrating net work with a time constant of 0.1 s) were stored together with analogue signals of ECG (electrocardiography) on an FM tape recorder (Sangamo Sabre VI). For analyses the mean voltage neurogram was displayed together with the ECG on an ink-jet recorder (Mingograph 800, Siemens-Elema Ltd, Sweden) with a paper speed of  $3 \text{ mm} \cdot \text{s}^{-1}$ . Records were divided into 5-min periods, and for each period the nerve activity was determined from the chart by counting the number of pulse synchronous bursts in the mean voltage neurogram and the mean nerve activity over this period was expressed as bursts per minute. Total sympathetic activity (bursts  $\cdot \text{min}^{-1}$  multiplied by mean burst amplitude) was not calculated because the mean burst amplitude is sensitive to even minor electrode displacements, which may have occurred during the course of the experiment (40–50 min). ECG was recorded by surface electrodes on the chest.

### CATECHOLAMINE ASSAY

Blood samples were in all experiments taken from a left antecubital vein (the cephalic or basilic vein) without venous occlusion *via* a short indwelling teflon catheter, which was inserted into the vein 30 min before the experiment. Five milliliters was sampled in iced tubes containing 140 units of heparin and  $100 \mu\text{l}$  of 0.4 M glutathione solution. The samples were placed in ice water for no more than 40 min before being centrifuged at  $4,000 \text{ r} \cdot \text{min}^{-1}$  for 15 min at  $4^\circ \text{C}$ . The plasma was removed and frozen at  $-70^\circ \text{C}$  until assay. The levels of epinephrine, norepinephrine, and dopamine were measured by electrochemical detection after high performance liquid chromatography.<sup>20</sup> A known amount of catecholamines was added to one sample in each series as an internal standard. The recovery of the added norepinephrine was  $90 \pm 1.4\%$  ( $n = 8$ ). No correction of this recovery was performed. The lower limit for the estimation was considered to be  $0.03 \text{ ng} \cdot \text{ml}^{-1}$  of catecholamine in human plasma.

### RECORDINGS OF BLOOD PRESSURE AND HEART RATE

Blood pressure and heart rate were measured automatically every minute by sphygmomanometry (Nippon Colin, Sphygmomanometer BP-203, W. A. Baum Co. Inc.). In all experiments the cuff was placed around from the right arm at heart level. Mean arterial pressure was calculated as diastolic pressure plus one-third of the pulse pressure.

### MEASUREMENT OF CALF BLOOD FLOW AND CALCULATION OF CALF VASCULAR RESISTANCE (CVR)

Volume plethysmography with the strain gauge technique<sup>21</sup> was used for blood flow determinations with the subjects in the supine position. A silicone tube, completely filled with mercury, was mounted around the right calf and the change in calf circumference during proximal venous occlusion (50 mmHg) was recorded with a bridge amplifier and displayed on a Grass Polygraph (model 7D). The right leg was flexed in hip and knee, resulting in an elevation of the lower leg by 20 cm above the heart level. Therefore, perfusion pressure was defined as mean arterial pressure in the right arm minus 15 mmHg. During the experimental procedure, blood flow measurements were made every minute and during measurements, blood flow to the right foot was occluded using a pressure cuff around the ankle. CVR was calculated from perfusion pressure divided by the calf blood flow and was expressed as  $\text{mmHg} \cdot \text{min} \cdot 100 \text{ g} \cdot \text{ml}^{-1}$  ( $\text{PRU}_{100}$ ).

# MECHANICAL VENTILATION

A Servo 900C ventilator (Siemens-Elema Ltd, Solna, Sweden) was used. The subjects were connected to the ventilatory system by an anatomically shaped mouthpiece, which offered low ventilatory resistance. A clip was placed over the nostrils. A single-use humidifier (Humivent, Giebeck, Sweden) was placed close to the mouthpiece. End-tidal  $\text{CO}_2$  (%) was measured in the expired air with a Normocap (Datex, Finland). Samples from the expired air were taken from a connecting tube placed next to the mouthpiece. During mechanical ventilation recordings of tidal volume ( $\text{ml} \cdot \text{breath}^{-1}$ ), peak and mean airway pressure ( $\text{cmH}_2\text{O}$ ), and end-tidal  $\text{CO}_2$  (%) were made every minute. During spontaneous breathing (control and recovery periods) the subjects were breathing normally with a noncontrolled tidal volume and during PEEP ventilation, tidal volume was adjusted according to the end-tidal  $\text{CO}_2$  (%) value. No extra oxygen was added.

Two series of experiments were performed in each of the eight subjects on two different occasions. In the first series MSNA was measured and in the second series calf blood flow and venous plasma catecholamines were measured during spontaneous breathing and mechanical ventilation with 0–20  $\text{cmH}_2\text{O}$  PEEP. With the subjects in a comfortable supine position, and after adaptation to the ventilatory system, the nerve recording electrode was inserted or the strain gauge attached. After a resting period with spontaneous breathing (15–20 min), recordings were made during seven periods. *Period 1.* Spontaneous breathing (this was regarded as the control period). *Period 2.* Mechanical ventilation with zero end-expiratory pressure (ZEEP). *Periods 3–6.* Mechanical ventilation with 5, 10, 15, and 20  $\text{cmH}_2\text{O}$  of PEEP, respectively. *Period 7.* Spontaneous breathing (recovery period). Each period included five measurements of all variables, and a given value from a period is the mean value from the five measurements. Blood samples for catecholamine assay were taken during the last 2 min of the control period, of periods 4 and 6 (10 and 20 PEEP), and of the recovery period.

## STATISTICS

For each period the mean values of the different variables were calculated and expressed as mean  $\pm$  SEM. Testing for significant changes of measured and calculated variables from control was performed by a one-way analysis of variance for repeated measurements followed by Dunnett's multiple range test. The correlation between muscle sympathetic activity (bursts per minute) and venous plasma norepinephrine levels was evaluated using a standard linear regression analysis. In both tests differences were considered statistically significant when  $P < 0.05$ .

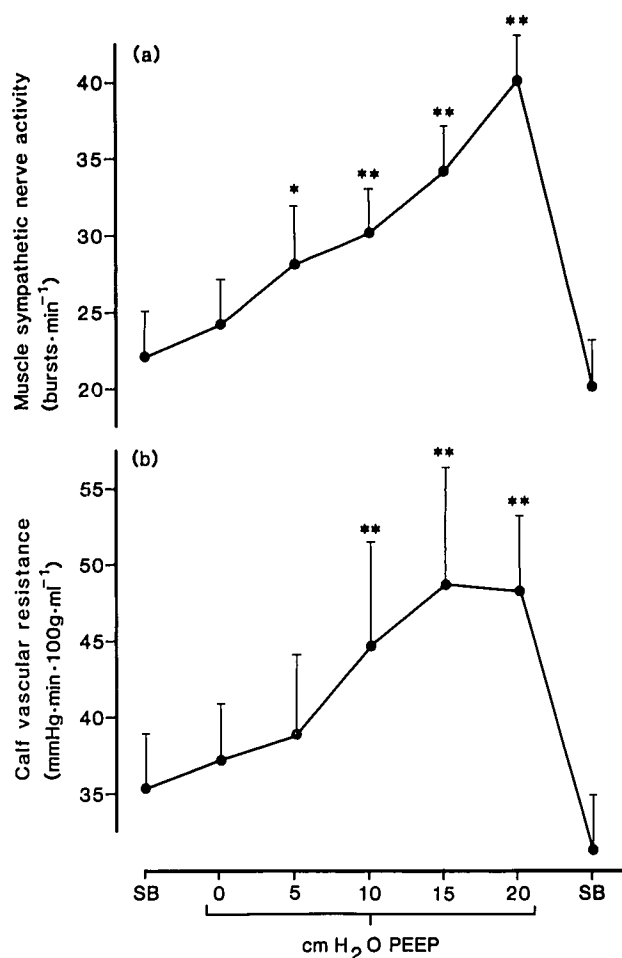

FIG. 1. Muscle sympathetic nerve activity (MSNA) and calf vascular resistance (CVR) during the control period (spontaneous breathing), during mechanical ventilation with 0–20  $\text{cmH}_2\text{O}$  PEEP and during the recovery (spontaneous breathing). All values are compared with values recorded at the control period. \* $P < 0.05$ ; \*\* $P < 0.01$ .

## Results

Mean values of MSNA and CVR are given in figure 1. Data from the catecholamine measurements in the second series are given in table 1. Mean values of systolic, diastolic, and mean arterial pressure and heart rate from both series are presented in table 2. Mean values of end-tidal  $\text{CO}_2$  (%), tidal volumes, and peak and mean airway pressures from both series are presented in table 3.

Mechanical ventilation with increasing levels of PEEP induced progressive and significant increases in MSNA (fig. 1). Figure 2 shows recordings of muscle sympathetic nerve activity and ECG from one of the subjects during spontaneous breathing, during ventilation with 10 and 20  $\text{cmH}_2\text{O}$  PEEP and finally during the recovery period. Note the increase in MSNA, both in number of bursts

TABLE 1. Forearm Venous Plasma Catecholamine Concentrations during the Control Period (spontaneous breathing), during Mechanical Ventilation with 10 and 20 cmH<sub>2</sub>O PEEP, and during the Recovery Period (spontaneous breathing)

|                           | Control<br>(n = 8) | 10 PEEP<br>(n = 8) | 20 PEEP<br>(n = 8) | Recovery<br>(n = 5) |
|---------------------------|--------------------|--------------------|--------------------|---------------------|
| Norepinephrine<br>(ng/ml) | 0.19 ± 0.02        | 0.23 ± 0.02        | 0.31 ± 0.03*       | 0.18 ± 0.03         |
| Epinephrine<br>(ng/ml)    | <0.03              | <0.03              | <0.03              | <0.03               |
| Dopamine<br>(ng/ml)       | <0.03              | <0.03              | <0.03              | <0.03               |

Values are mean ± SEM.

\*  $P < 0.01$  compared with control.

per minute and mean voltage amplitudes of the bursts, when PEEP ventilation was applied. This figure also demonstrates the rapid decrease in MSNA when mechanical ventilation with 20 cm H<sub>2</sub>O PEEP was changed to spontaneous breathing.

The increase in MSNA was accompanied by a significant increase in CVR at 10–20 cm H<sub>2</sub>O PEEP. Maximal CVR was reached during 15 cm H<sub>2</sub>O PEEP and there was no further increase during 20 cm H<sub>2</sub>O PEEP. During the recovery period (spontaneous breathing after 20 cm H<sub>2</sub>O PEEP), both MSNA and CVR returned rapidly to values slightly less than control. There were no significant differences when comparing the values of MSNA and CVR during control period with values in the recovery period.

Forearm venous plasma norepinephrine concentration increased following the application of PEEP, and the increase reached statistical significance at 20 cm H<sub>2</sub>O PEEP. During recovery plasma norepinephrine was not significantly different from the control value. Plasma levels of epinephrine and dopamine were below 0.03 ng·ml<sup>-1</sup>

throughout the experiment. The plasma concentration of norepinephrine correlated significantly with the level of muscle sympathetic nerve activity ( $P < 0.01$ ,  $r = 0.523$ ; fig. 3).

Mechanical ventilation with increasing levels of PEEP induced no significant changes in systolic, diastolic, or mean arterial blood pressure at PEEP levels below 15 cm H<sub>2</sub>O. At 15 cm H<sub>2</sub>O PEEP, in the second series the systolic blood pressure increased significantly, and at 20 cm H<sub>2</sub>O PEEP there were significant increases in blood pressures in both series. There were no significant changes in heart rate at PEEP levels below 20 cm H<sub>2</sub>O. At 20 cm H<sub>2</sub>O PEEP in the first series, heart rate increased significantly. During the recovery period blood pressures and heart rate did not differ significantly from control values.

During mechanical ventilation with PEEP, end-tidal CO<sub>2</sub> (%) decreased in the first series (from 4.7% to 4.3%,  $P < 0.05$ ) but not in the second series. Tidal volumes did not change significantly throughout the experiments. Peak and mean airway pressure increased to the same extent in both series of experiments.

### Discussion

The main findings of this study were that mechanical ventilation with increasing levels of PEEP induced a significant increase of MSNA together with significant increases in CVR and forearm venous plasma norepinephrine. Only minor blood pressure changes occurred during PEEP ventilation, with a small increase at the highest PEEP levels. A systematic relationship between MSNA and forearm venous plasma concentrations of norepinephrine has been found previously<sup>22</sup> and also in the present study, there was a positive correlation between venous plasma norepinephrine and MSNA (fig. 3). Therefore, it is likely that the increase in forearm venous

TABLE 2. Blood Pressure and Heart Rate during Spontaneous Breathing and Mechanical Ventilation with Increasing Levels of PEEP

|                               | First Series |         |                           |         |         |         |          | Second Series |         |                           |         |          |          |          |
|-------------------------------|--------------|---------|---------------------------|---------|---------|---------|----------|---------------|---------|---------------------------|---------|----------|----------|----------|
|                               | SB (Co)      | ZEEP    | PEEP (cmH <sub>2</sub> O) |         |         |         | SB (Rec) | SB (Co)       | ZEEP    | PEEP (cmH <sub>2</sub> O) |         |          |          | SB (Rec) |
|                               |              |         | 5                         | 10      | 15      | 20      |          |               |         | 5                         | 10      | 15       | 20       |          |
| Systolic pressure (mmHg)      | 121 ± 4      | 118 ± 3 | 119 ± 4                   | 119 ± 4 | 121 ± 3 | 125 ± 4 | 123 ± 4  | 117 ± 2       | 119 ± 2 | 118 ± 2                   | 119 ± 3 | 122 ± 3† | 127 ± 4* | 116 ± 3  |
| Diastolic pressure (mmHg)     | 73 ± 3       | 72 ± 2  | 73 ± 3                    | 73 ± 3  | 76 ± 3  | 77 ± 3  | 72 ± 3   | 71 ± 2        | 72 ± 2  | 73 ± 4                    | 71 ± 2  | 73 ± 2   | 76 ± 3†  | 72 ± 3   |
| Mean arterial pressure (mmHg) | 91 ± 3       | 91 ± 2  | 92 ± 3                    | 92 ± 2  | 93 ± 2  | 97 ± 3* | 89 ± 3   | 92 ± 2        | 89 ± 2  | 87 ± 2                    | 89 ± 3  | 92 ± 3   | 96 ± 3*  | 89 ± 2   |
| Heart rate (beats/min)        | 64 ± 3       | 65 ± 3  | 63 ± 3                    | 63 ± 3  | 66 ± 3  | 69 ± 3* | 65 ± 3   | 68 ± 3        | 66 ± 3  | 64 ± 3                    | 64 ± 3  | 64 ± 3   | 67 ± 4   | 70 ± 3   |

Values are mean ± SEM. SB = spontaneous breathing; Co = control; Rec = recovery.

\*  $P < 0.01$  compared with control.†  $P < 0.05$  compared with control.

TABLE 3. End-tidal CO<sub>2</sub>(%), Tidal Volume, and Airway Pressure during Mechanical Ventilation with Increasing Levels of PEEP

|                                           | First Series |                            |            |            |            | Second Series |                            |            |            |            |
|-------------------------------------------|--------------|----------------------------|------------|------------|------------|---------------|----------------------------|------------|------------|------------|
|                                           | ZEEP         | PEEP (cm H <sub>2</sub> O) |            |            |            | ZEEP          | PEEP (cm H <sub>2</sub> O) |            |            |            |
|                                           |              | 5                          | 10         | 15         | 20         |               | 5                          | 10         | 15         | 20         |
| CO <sub>2</sub> (%)                       | 4.7 ± 0.2    | 4.4 ± 0.2*                 | 4.3 ± 0.2* | 4.3 ± 0.2† | 4.3 ± 0.2† | 4.8 ± 0.1     | 4.8 ± 0.1                  | 4.8 ± 0.1  | 4.8 ± 0.1  | 4.9 ± 0.1  |
| Tidal volume (ml)                         | 655 ± 21     | 648 ± 23                   | 655 ± 17   | 648 ± 18   | 645 ± 18   | 580 ± 27      | 591 ± 22                   | 581 ± 21   | 584 ± 20   | 598 ± 18   |
| Peak pressure (cmH <sub>2</sub> O)        | 12.4 ± 2.0   | 16.4 ± 1.1                 | 19.5 ± 0.8 | 24.9 ± 1.2 | 30.5 ± 1.4 | 11.0 ± 0.8    | 14.0 ± 0.8                 | 19.3 ± 0.9 | 24.5 ± 1.6 | 32.1 ± 1.7 |
| Mean airway pressure (cmH <sub>2</sub> O) | 2.5 ± 0.2    | 6.7 ± 0.3                  | 11.1 ± 0.2 | 15.8 ± 0.3 | 20.7 ± 0.5 | 3.2 ± 0.2     | 8.3 ± 0.3                  | 12.2 ± 0.3 | 17.0 ± 0.3 | 21.6 ± 0.3 |

Values are mean ± SEM.

\* *P* < 0.01 compared with ZEEP.† *P* < 0.05 compared with ZEEP.

plasma norepinephrine primarily reflected a spillover of norepinephrine from sympathetic nerve endings in muscles to the veins draining the muscle vascular bed. Our data on the effects of PEEP ventilation on plasma catecholamines agree with those of Payen *et al.*,<sup>6</sup> who found that increasing PEEP levels (0–15 cm H<sub>2</sub>O PEEP) resulted in a significant rise in venous plasma norepinephrine, while epinephrine was unchanged. There are several mechanisms to be considered when explaining the increases in MSNA, CVR, and venous plasma norepinephrine during PEEP ventilation.

It may be suggested that the experimental situation with PEEP ventilation could cause mental stress and thereby activate the sympathoadrenal system. For several reasons this is an unlikely explanation for the present findings: 1) heart rate, which usually is a sensitive indicator of mental stress,<sup>23–25</sup> did not increase during the 40–50 min experimental procedure—the one exception was the minor increase at 20 cm H<sub>2</sub>O PEEP in the first series; 2) it has been shown that during mental stress, peripheral venous plasma epinephrine often increases<sup>23,25,26</sup>; during the experiment levels of peripheral venous epinephrine were less than 0.03 ng · ml<sup>-1</sup>; however, in arterial blood, not measured in this study, the levels of epinephrine may have been higher at some situations but inactivated after perfusing the tissue; and 3) in previous studies mental stress caused no or only minor increases of MSNA<sup>19,27,28</sup> or venous plasma norepinephrine,<sup>23,25,26</sup> *i.e.*, even if mental stress did occur, it would not have the observed effects.

Another and more likely explanation for the progressive increases of MSNA, CVR, and plasma norepinephrine concentrations during PEEP ventilation, and the prompt return to control levels after PEEP, is a cardiovascular reflex activation of sympathetic outflow. Several receptor populations should be considered as initiators of such effects.

Arterial baroreceptors in the carotid sinus can probably be ruled out. Even if they may affect MSNA in humans,<sup>29</sup>

arterial blood pressure did not fall during PEEP, *i.e.*, no decrease in the transmural pressure of the arterial wall (“unloading” of the carotid receptors) occurred, which could have triggered a reflex increase in MSNA. There are no data in humans on the relative role of the aortic baroreceptors in cardiovascular reflex control. The increased intrathoracic pressure during PEEP would theoretically have caused a decrease in aortic transmural pressure, thus causing an unloading of the aortic receptors. However, in terms of aortic transmural pressure, the progressive increase of intrathoracic pressure would have been counteracted by the elevated arterial blood pressure at higher PEEP levels. Thus, the aortic receptors may have contributed, but probably not any large extent, for the PEEP-induced reflex increase in MSNA.

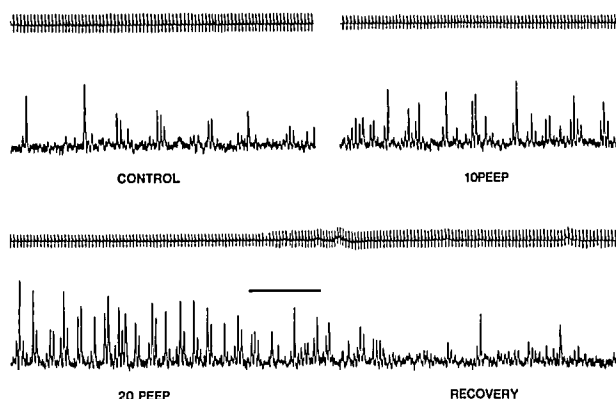

FIG. 2. Peroneal mean voltage neurogram and ECG from one subject during the control period (spontaneous breathing), mechanical ventilation with 10 and 20 cm H<sub>2</sub>O PEEP, and finally during recovery (spontaneous breathing). At 10 and 20 cm H<sub>2</sub>O PEEP the nerve activity was progressively enhanced compared with control, both in number of bursts per minute and in the mean voltage amplitude of each burst. There was a rapid decrease in sympathetic nerve activity when ventilation with 20 cm H<sub>2</sub>O PEEP was changed to spontaneous breathing (recovery). The bar indicates 25 s.

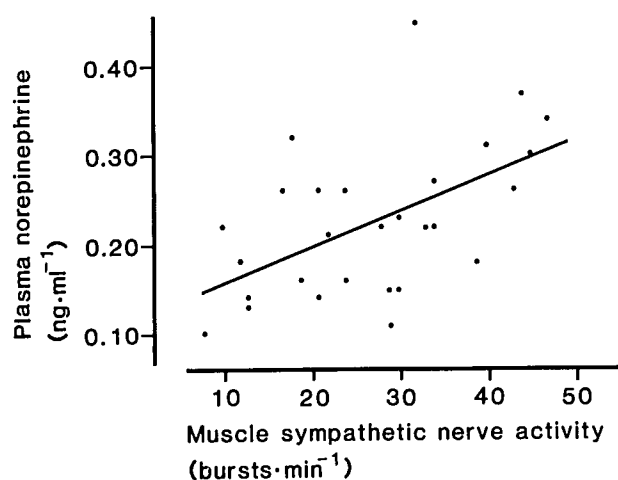

FIG. 3. Correlation between peroneal muscle sympathetic nerve activity and plasma norepinephrine during spontaneous breathing and mechanical ventilation with 0–20 cmH<sub>2</sub>O PEEP.  $r = 0.523$ ,  $P < 0.01$  (linear regression analysis).

There is indirect evidence that important cardiovascular reflexes may be elicited by cardiopulmonary sensory receptors also in humans. From animal studies it is known that these receptors are located mainly in the left atrium and left ventricle, but also distributed in the right atrium and right ventricle, in the right and left vein-atrial junctions and in the pulmonary veins.<sup>30–33</sup> Application of lower body negative pressure (LBNP) to –20 mmHg decreases central venous pressure without changing mean arterial pressure, pulse pressure or heart rate, implying a selective unloading of the cardiopulmonary receptors.<sup>34–37</sup> LBNP also increases forearm vascular resistance<sup>34,38,39</sup> and MSNA.<sup>36</sup>

What is the evidence that also mechanical ventilation with PEEP decreases cardiac transmural pressures with a consequent decrease in the activity of the cardiopulmonary low-pressure baroreceptors?

In both animals and humans, PEEP ventilation decreases central blood volume,<sup>2,5,16,40,41</sup> right and left ventricular end-diastolic transmural pressures,<sup>1,3,10,42</sup> right and left atrial transmural pressures,<sup>3,16,43</sup> and left ventricular diameter.<sup>4,9,10,42,44</sup> Furthermore, it has recently been found in humans that mechanical ventilation with 15–20 cmH<sub>2</sub>O PEEP decreases the ventricular, as well as the atrial volumes.<sup>45,46</sup> It is therefore likely that the PEEP-induced increase in MSNA, CVR, and plasma norepinephrine, as found in this study, to a large extent was caused by an unloading of cardiopulmonary low-pressure baroreceptors.

Pulmonary stretch receptors with vagal afferents respond to lung inflation. From animal experiments it is known that low levels of static lung inflation in dogs induces an excitatory reflex with tachycardia and vasoconstriction,<sup>47–49</sup> probably mediated by pulmonary A-fibers

with a threshold airway pressure for activation around 5 cmH<sub>2</sub>O.<sup>50</sup> At higher levels of static lung inflation, a depressor reflex with bradycardia and decrease in blood pressure is seen,<sup>48,49,51–53</sup> probably mediated by pulmonary C-fibers with a threshold around 15 cmH<sub>2</sub>O. If these findings in animals can be applied in humans, and if activation of both types of pulmonary stretch receptors were significant for the MSNA reflex response to PEEP ventilation in humans, a biphasic response would have been expected. In other words, the sympathetic excitation during lower levels of PEEP would have been followed by an inhibition at higher PEEP levels. The present findings with progressive increases in MSNA, CVR, and plasma norepinephrine do not suggest an important role for pulmonary stretch receptors for the sympathetic reflex response to PEEP in humans.

Abdominal low-pressure baroreceptors with sympathetic afferents may also elicit excitatory sympathetic reflexes.<sup>54</sup> Because PEEP ventilation causes venous congestion, this may result in an activation of such venous baroreceptors and cause reflex sympathetic activation. In anesthetized animals PEEP ventilation induces a reflex increase in splanchnic and renal sympathetic nerve activity and in heart rate.<sup>16,17</sup> This sympathetic excitation was clearly attenuated when either arterial baroreceptors or cardiopulmonary receptors were selectively denervated. After deafferentation of both receptor populations, PEEP ventilation caused no change in sympathetic nerve activity. These findings do not support the hypothesis that abdominal venous baroreceptors are of importance for cardiovascular reflex adaptation during PEEP ventilation.

In the first series during MSNA recordings, end-tidal CO<sub>2</sub> (%) decreased significantly (from 4.7% to 4.3%) from ZEEP to 20 PEEP (table 3). Providing that the decrease in end-tidal CO<sub>2</sub> (%) was reflected by a similar decrease in arterial pCO<sub>2</sub>, this would slightly have attenuated the reflex excitation of MSNA, as it is known from animal work that hypocapnia decreases peripheral sympathetic discharge.<sup>55,56</sup>

In conclusion, the results of the present study demonstrated that mechanical ventilation with increasing levels of PEEP in conscious humans induces a reflex excitation of MSNA, concomitant with an increase of CVR, and an increase in venous plasma norepinephrine. This PEEP-induced reflex excitation of the sympathetic nervous system was probably elicited by unloading of cardiopulmonary low-pressure baroreceptors.

The authors thank Ann-Sofie Gundersen for skillful technical assistance.

## References

1. Cournand A, Motley HL, Werkö L, Richards DW Jr: Physiological studies of the effects of intermittent positive pressure breathing on cardiac output in man. *Am J Physiol* 152:162–174, 1948
2. Braunwald E, Binion JT, Morgan WL Jr, Sarnoff SJ: Alterations

- in central blood volume and cardiac output induced by positive pressure breathing and counteracted by metaraminol (Aramine). *Circ Res* 5:670-675, 1957
3. Qvist J, Pontoppidan H, Wilson RS, Lowenstein E, Laver MB: Hemodynamic responses to mechanical ventilation with PEEP: The effect of hypovolemia. *ANESTHESIOLOGY* 42:45-55, 1975
4. Cassidy SS, Eschenbacher WL, Robertsson CH Jr, Nixon JV, Blomqvist G, Johnson RL Jr: Cardiovascular effects of positive-pressure ventilation in normal subjects. *J Appl Physiol* 47: 453-461, 1979
5. Bjurstedt H, Rosenhamer B, Lindborg B, Hesser CM: Respiratory and circulatory responses to sustained positive pressure breathing and exercise in man. *Acta Physiol Scand* 105:204-214, 1979
6. Payen DM, Farge D, Beloucif S, Levie F, De La Coussaye JE, Carli P, Wirquin V: No involvement of antidiuretic hormone in acute antidiuresis during PEEP ventilation in humans. *ANESTHESIOLOGY* 65:17-23, 1987
7. Patten MT, Liebman PR, Manny J, Sherpo D, Hechtman HB: Humoral consequence of positive end-expiratory pressure. *Surgery* 84:201-205, 1978
8. Cassidy SS, Mitchell JH, Johnson RL: Dimensional analysis of right and left ventricles during positive-pressure ventilation in dogs. *Am J Physiol* 242:H549-H556, 1982
9. Jardin F, Farcot JC, Boissante L, Curien N, Margairaz A, Bourdarias JP: Influence of positive end-expiratory pressure on left ventricular performance. *N Engl J Med* 304:387-392, 1981
10. Santamore WP, Bove AA, Heckman JL: Right and left ventricular pressure-volume response to positive end-expiratory pressure. *Am J Physiol* 246:H114-H119, 1984
11. Marquez JM, Douglas ME, Downs JB, Wu WH, Mantini EL, Kuck EJ, Calderwood HW: Renal function and cardiovascular responses during positive airway pressure. *ANESTHESIOLOGY* 50: 393-398, 1979
12. Blair DA, Glover WE, Kidd BSL: The effect of continuous positive and negative pressure breathing upon the resistance and capacity blood vessels of the human forearm and hand. *Clin Sci* 18:9-16, 1959
13. Watson WE: Vascular distensibility of the hand during pressure breathing. *Br J Anaesth* 33:600-605, 1961
14. Ziegler M, Janzik W, Miksche L, Möhring H, Weigand W, Gross F: Effects of positive and negative pressure breathing on plasma renin concentration in the dog. *Pflügers Arch* 348:185-196, 1974
15. Annat G, Viale JP, Bui Xuam B, Hadj-Aissa O, Benzoni D, Vincent M, Gharib C, Motin J: Effect of PEEP ventilation on renal function, plasma renin, aldosterone, neurophysins and urinary, ADH and prostaglandins. *ANESTHESIOLOGY* 58:136-141, 1983
16. Selldén H, Sjövall H, Ricksten SE: Sympathetic nerve activity and central haemodynamics during mechanical ventilation with positive end-expiratory pressure in rats. *Acta Physiol Scand* 127: 51-60, 1986
17. Selldén H, Delle M, Sjövall H, Ricksten SE: Reflex changes in sympathetic nerve activity during mechanical ventilation with PEEP in sino-aortic denervated rats. *Acta Physiol Scand* 130: 15-24, 1987
18. Hagbarth KE, Vallbo AB: Pulse and respiratory grouping of sympathetic impulses in human muscle nerves. *Acta Physiol Scand* 74:96-108, 1968
19. Delius W, Hagbarth KE, Hongell A, Wallin BG: General characteristics of sympathetic activity in human muscle nerves. *Acta Physiol Scand* 84:65-81, 1972
20. Hallman H, Farnebo LO, Hamberger B, Jonsson G: A sensitive method for determination of plasma catecholamines using a liquid chromatography with electrochemical detection. *Life Sci* 23:1049-1052, 1978
21. Whitney RJ: The measurement of volume changes in human limbs. *J Physiol (Lond)* 121:1-27, 1953
22. Wallin BG: Muscle sympathetic activity and plasma concentrations of noradrenaline. *Acta Physiol Scand [Suppl]* 527:21-24, 1984
23. Eliasson K, Hjemdahl P, Kahan T: Circulatory and sympathoadrenal responses to stress in borderline and established hypertension. *J Hypertens* 1:131-139, 1983
24. Mancia G, Mark AL: Arterial baroreflexes in humans, *Handbook of Physiology, The Cardiovascular System*, section 2, volume 3. Edited by Shepherd JT, Abboud FM. Bethesda, MD, American Physiological Society 1983, pp 755-793
25. Hjemdahl P, Freyschuss U, Juhlin-Dannfelt A, Linde B: Differentiated sympathetic activation during mental stress evoked by the Stroop test. *Acta Physiol Scand [Suppl]* 527:25-29, 1984
26. Åkerstedt T, Gillberg M, Hjemdahl P, Sigurdson K, Gustavsson I, Daleskog M, Pollare T: Comparison of urinary and plasma catecholamine responses to mental stress. *Acta Physiol Scand* 117:19-26, 1983
27. Wallin BG, Delius W, Hagbarth KE: Comparison of sympathetic nerve activity in the normotensive and hypertensive subjects. *Circ Res* 33:9-21, 1973
28. Anderson EA, Wallin BG, Mark AL: Dissociation of sympathetic nerve activity in arm and leg muscle during mental stress. *Hypertension* 9(suppl 3):114-119, 1987
29. Wallin BG, Sundlöf G, Delius W: The effect of carotid sinus nerve stimulation on muscle and skin sympathetic nerve activity in man. *Pflügers Arch* 358:101-110, 1975
30. Kappagoda CT, Linden RJ, Snow HM, Whitaker EM: Left atrial receptors and the antidiuretic hormone. *J Physiol (Lond)* 237: 663-683, 1974
31. Linden RJ: Reflexes from receptors in the heart. *Cardiology* 61(suppl 1):7-30, 1976
32. Thorén P: Role of cardiac C-fibers in cardiovascular control. *Rev Physiol Biochem Pharmacol* 86:1-94, 1979
33. Linden RJ: Sensory endings in the heart with comment on excitatory reflexes, *Neural Mechanisms and Cardiovascular Disease*. Edited by Lown B, Malliani A, Prosdocimi M. Fidia Research Series, volume 5. Pradova, Liviana Press, 1986, pp 11-33
34. Zoller RP, Mark AL, Abboud FM, Schmid PG, Heistad DD: The role of low pressure baroreceptors in reflex vasoconstrictor response in man. *J Clin Invest* 51:2967-2972, 1972
35. Mark AL, Abboud FM, Fitz AE: Influence of low- and high-pressure baroreceptors on plasma renin activity in humans. *Am J Physiol* 235:H29-H33, 1978
36. Sundlöf G, Wallin BG: Effect of lower body negative pressure on human muscle nerve sympathetic nerve activity. *J Physiol (Lond)* 278:525-532, 1978
37. Takeshita A, Mark AL, Eckberg DL: Effect of changes in central venous pressure on arterial baroreflex control of heart rate in humans. *Am J Physiol* 236:H42-H47, 1979
38. Gilbert CA, Stevens PM: Forearm vascular responses to lower body negative pressure and orthostasis. *J Appl Physiol* 21:1265-1272, 1966
39. Johnson JM, Rowell LB, Niederberger M, Eisman MM: Human splanchnic and forearm vasoconstrictor responses to reductions of right atrial and aortic pressure. *Circ Res* 34:515-524, 1974
40. Kilburn KH, Sieker HO: Hemodynamic effects of continuous positive and negative pressure breathing in normal man. *Circ Res* 8:660-669, 1960
41. Sjövall H, Redfors S, Biber B, Martner J, Winsö O: Evidence for cardiac volume-receptor regulation of feline jejunal blood flow and fluid transport. *Am J Physiol* 246:G401-G410, 1984
42. Fewell JE, Abendschein DR, Carlson J, Murray JF, Rapaport E: Mechanism of decreased right and left ventricular end-diastolic volumes during continuous positive-pressure ventilation in dogs. *Circ Res* 47:467-472, 1980

43. Scharf SM, Brown R, Saunders N, Green LH, Ingham RH: Changes in canine left ventricular size and configuration with positive end-expiratory pressure. *Circ Res* 44:672-678, 1979
44. Fewell JE, Abendschein DR, Carlson CJ, Murray JF, Rapaport E: Continuous positive-pressure ventilation decreases right and left ventricular end-diastolic volumes in the dog. *Circ Res* 46:125-132, 1980
45. Terai C, Uenishi M, Sugimoto H, Shimazu T, Yoshioka T, Sugimoto T: Transesophageal echocardiographic dimensional analysis of four cardiac chambers during positive end-expiratory pressure. *ANESTHESIOLOGY* 63:640-646, 1985
46. Dhainaut JF, Devaux JY, Monsallier JF, Brunet F, Villemant D, Huyghebaert MF: Mechanisms of decreased left ventricular preload during positive pressure ventilation in ARDS. *Chest* 90:74-80, 1986
47. Angell-James JE, Daly MB: The effects of artificial lung inflation on reflexly induced bradycardia associated with apnoea in the dog. *J Physiol (Lond)* 274:349-366, 1978
48. Hainsworth R: Circulatory responses from lung inflation in the anesthetized dog. *Am J Physiol* 226:247-255, 1974
49. Kaufman MP, Iwamoto GA, Ashton JH, Cassidy SS: Responses to inflation of vagal afferents with endings in the lung of dogs. *Circ Res* 51:525-531, 1982
50. Kaufman MP, Oedway GA, Waldrop TG: Effect of PEEP on discharge of pulmonary C-fibers in dogs. *J Appl Physiol* 59:1085-1089, 1985
51. Glick G, Wechsler AS, Epstein SE: Reflex cardiovascular depression produced by stimulation of pulmonary stretch receptors in the dog. *J Clin Invest* 48:467-473, 1969
52. Ott NT, Shepherd JT: Vasopressor reflex from lung inflation in the rabbit. *Am J Physiol* 221:889-895, 1971
53. Cassidy S, Eschenbacher WL, Johnsson RL: Reflex cardiovascular depression during unilateral lung hyperinflation in the dog. *J Clin Invest* 64:620-626, 1979
54. Kampine JP, Kostreva DR: The abdominal sympathetic afferent fibers and their reflex function, *Neural Mechanisms and Cardiovascular Disease*. Edited by Lown B, Malliani A, Prosdocimi M. Fidia Research Series, volume 5. Pradova, Liviana Press, 1986, pp 47-61
55. Elam M, Yao T, Thorén P, Svensson TH: Hypercapnia and hypoxia: Chemoreceptor-mediated control of locus coeruleus neurons and splanchnic sympathetic nerves. *Brain Res* 222:373-381, 1981
56. Moster WG, Reier CE, Gradier RW, Hamelberg W: Cardiac output and postganglionic sympathetic nerve activity during acute respiratory alkalosis. *ANESTHESIOLOGY* 31:28-34, 1969
